# Supplementary material
Source: Springer Nature journal article supplement (https://www.springermedizin.de/resource/supplementary/13054_2012_1866_MOESM2_ESM.pdf/9711690)
Supplement: MOESM2 [file 9711690]

Records identified through  
database search  
(n = 1951)

Records after duplicates removed  
(n = 586)

Additional records identified  
through other sources  
(n = 19)

Records screened  
(n = 605)

Records excluded  
(n = 459)

Full-text articles  
assessed for eligibility  
(n = 146)

Full-text articles excluded:  
inclusion criteria not met  
(n = 96)  
insufficient data  
(n = 15)

Studies included in review  
(n = 35)

Studies included in  
primary analysis (n = 31)

Studies included in  
secondary analysis (n=4)
